# Supplementary material
Source: publisher figshare collection journal article supplement (https://acs.figshare.com/ndownloader/files/3986188)
Supplement: Supplementary file 1 [file 3986188]

# Supporting Information

## **A Label-free Si Quantum Dots-based Photoluminescence Sensor for Ultrasensitive Detection of Pesticides**

Yinhui Yi,<sup>1†</sup> Gangbing Zhu,<sup>1‡</sup> Chang Liu,<sup>†</sup> Yan Huang,<sup>‡</sup> Youyu Zhang,<sup>\*,†</sup> Haitao Li,<sup>†</sup> Jiangna Zhao<sup>†</sup>,  
and Shouzhuo Yao<sup>†,‡</sup>

<sup>†</sup>Key Laboratory of Chemical Biology and Traditional Chinese Medicine Research (Ministry of Education),  
College of Chemistry and Chemical Engineering, Hunan Normal University, Changsha 410081, PR China

<sup>‡</sup>State Key Laboratory of Chemo/Biosensing and Chemometrics, College of Chemistry and Chemical  
Engineering, Hunan University, Changsha 410082, PR China

\*Corresponding author. Tel: +86-731-8865515; fax: +86-731-8865515;

E-mail address: zhangyy@hunnu.edu.cn    zhangyy0101@126.com

**The fluorescence quantum yields measurements:** Photoluminescence (PL) quantum yields of the silicon quantum dots were obtained by using the comparative method of Williams et al.<sup>1</sup> The quantum yield of SiQDs,  $Q_x$ , is calculated according to the equation 1:

$$Q_x = Q_R \cdot \frac{A_R}{A_x} \cdot \frac{F_x}{F_R} \cdot \left( \frac{n_x}{n_R} \right)^2 \quad (1)$$

where  $Q_R$  is the quantum yield of the standard,  $A$  is the absorbance of the solution,  $F$  is the corrected emission intensity and  $n$  is the average refractive index of the solution. Subscripts R and X refer to the reference and SiQDs, respectively. Quinine sulfate is used as the standard for the quantum yield correction. Fletcher<sup>2</sup> reported that the relative fluorescence quantum yield of quinine sulfate have no unexplainable deviations from a constant value with the excitation range set from 240 to 400 nm. The maximum excitation wavelengths of silicon quantum dots are at ~360 nm. Therefore, we chose 360 nm as the excitation wavelength. The quinine sulfate ( $Q_R = 0.54$ ) was dissolved in 0.1 M  $H_2SO_4$  (refractive index ( $n_R$ ) of 1.33) and the SiQDs was dissolved in absolute ethanol ( $n_x = 1.003$ ).<sup>3</sup> To minimize re-absorption effects, the absorbances of SiQDs and quinine sulfate solution were adjusted never exceed 0.1 at the excitation wavelength. The measurement results are as follows:  $A_R=0.051$ ,  $A_x=0.049$ ,  $F_x=2382$ ,  $F_R=7895$ ,  $\frac{n_x}{n_R} = 0.7541$ . The PL quantum yields of SiQDs were up to ~9.6%.

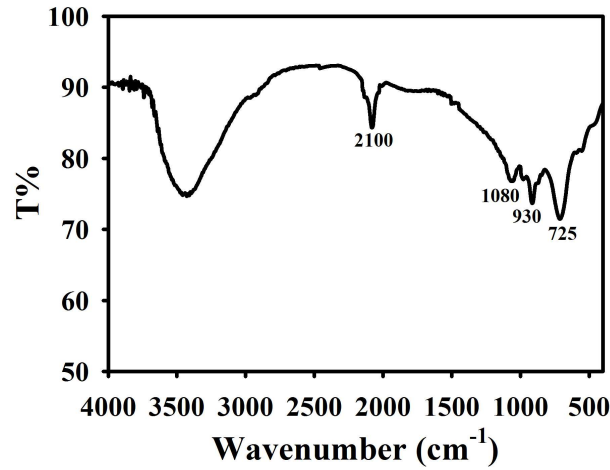

**Figure S1.** FTIR spectra of SiQDs.

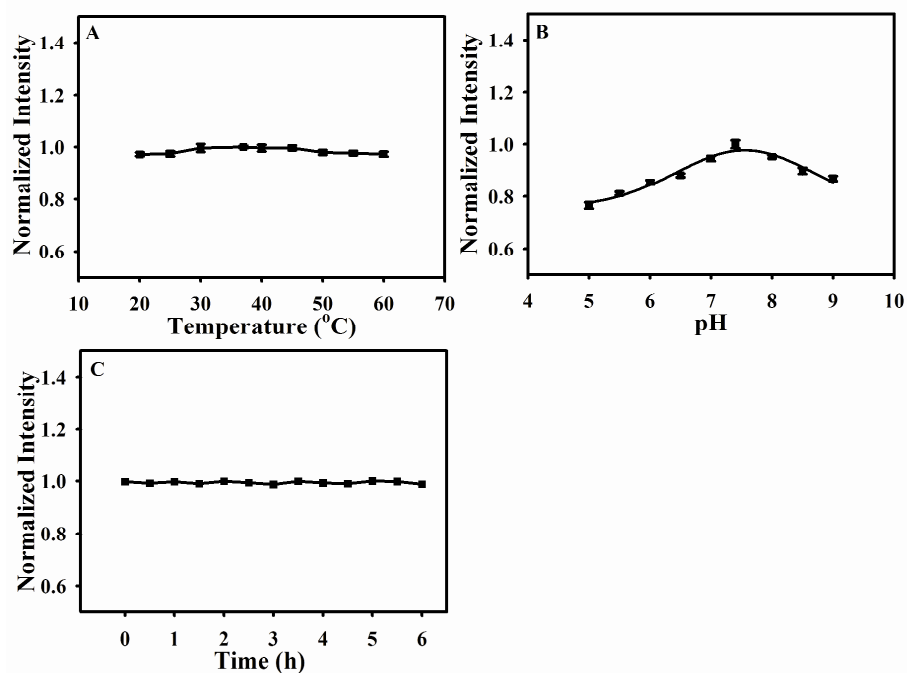

**Figure S2.** Effects of temperature (A), pH (B) and photostability (C) on the PL intensity of SiQDs solution.

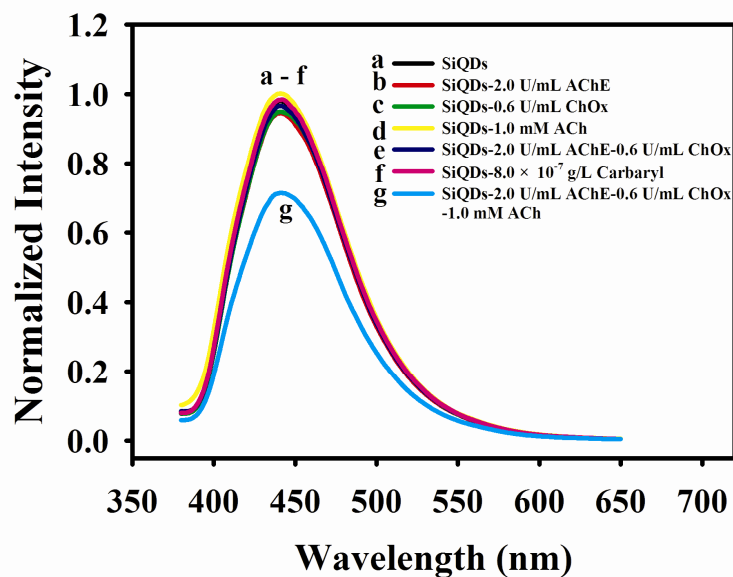

**Figure S3.** PL spectra of SiQDs solution. (a) only SiQDs and buffer, (b) SiQDs +2 U/mL AChE, (c) SiQDs + 0.6 U/mL ChOx, (d) SiQDs + 1.0 mM ACh, (e) SiQDs + 2 U/mL AChE + 0.6 U/mL ChOx, (f) SiQDs +  $8.0 \times 10^{-7}$  g/L carbaryl and (g) SiQDs + 2 U/mL AChE + 0.6 U/mL ChOx + 1.0 mM ACh, respectively.

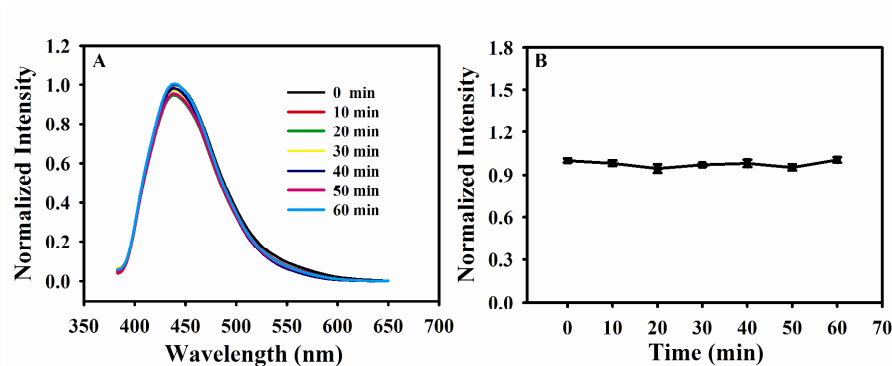

**Figure S4.** (A) Time-dependent PL spectra of SiQDs-AChE-ChOx system in the saturated oxygen atmosphere. (B) Effects of reaction time (0-60 min) on the PL intensity of SiQDs-AChE-ChOx system. The measurements were performed at 40 °C in PBS (pH 8.0) and enough oxygen was passed. The concentrations of AChE and ChOx are 2 U/mL and 0.6 U/mL, respectively.

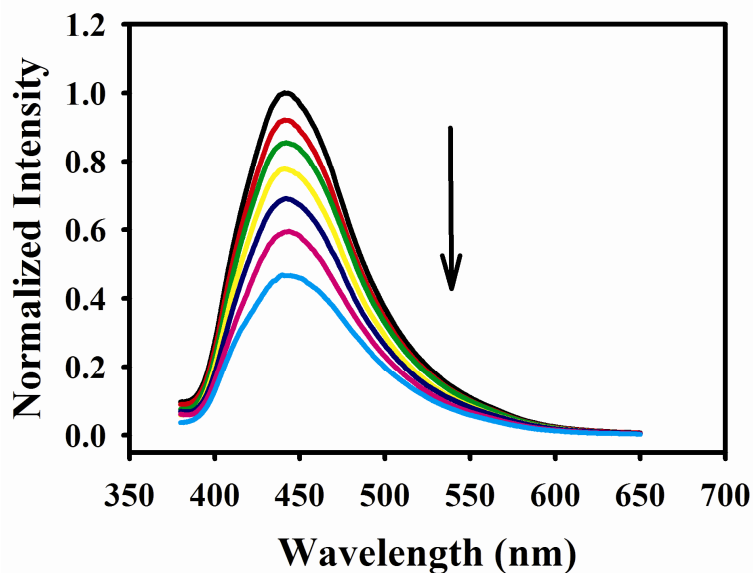

**Figure S5.** PL spectra of SiQDs upon stepwise addition of  $H_2O_2$  (from top to bottom, the final concentration of  $H_2O_2$  is 0, 35, 120, 200, 300, 450 and 600  $\mu$ M, respectively).

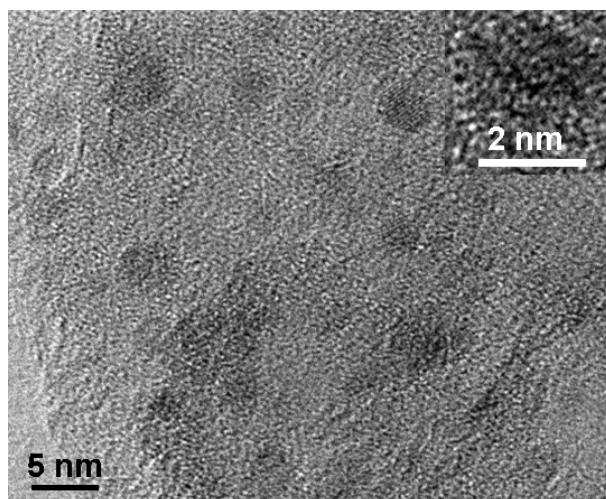

**Figure S6.** Transmission electron microscopy image of SiQDs-AChE-ChOx system in the present of 1.0 mM ACh; the insert shows the high-resolution transmission electron microscopy image of SiQDs-AChE-ChOx system in the present of 1.0 mM ACh.

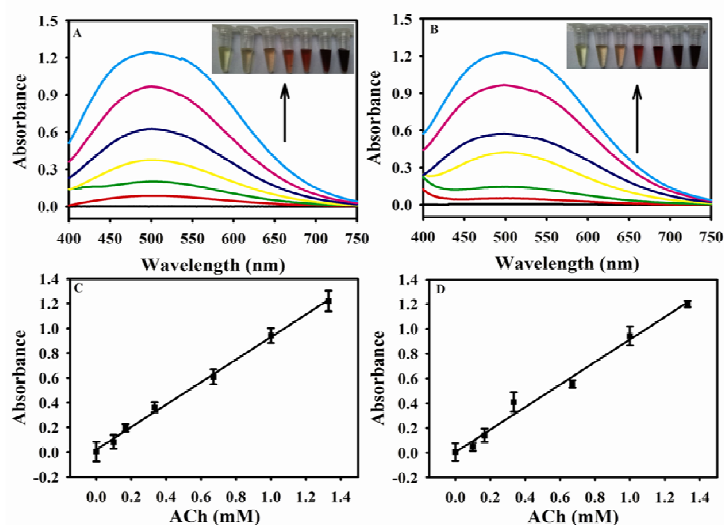

**Figure S7.** (A, B): Absorbance spectra of variable concentrations of ACh upon the interaction with AChE, ChOx and alkaline hydroxylamine in the presence (A) and absence (B) of SiQDs; The insert shows the color change with increasing concentrations of ACh from left to right (0-1.33 mM). (C, D) : Plots of the absorption band at 520 nm vs ACh concentrations in the presence (C) and absence (D) of SiQDs.

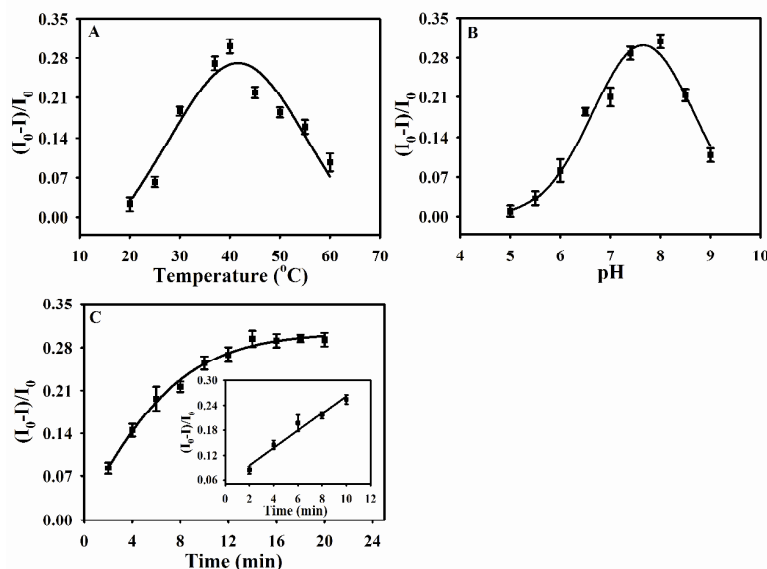

**Figure S8.** The effect of pH, temperature and time on the PL quenching of SiQDs-AChE-ChOx system in the absence and presence of 1.0 mM ACh. The insert shows a linear response of the PL intensity of SiQDs-AChE-ChOx system vs the incubation time from 0 to 10 min.  $I_0$  and  $I$  represent the PL intensity of the SiQDs-ChOx-AChE system before and after incubating with ACh, respectively.

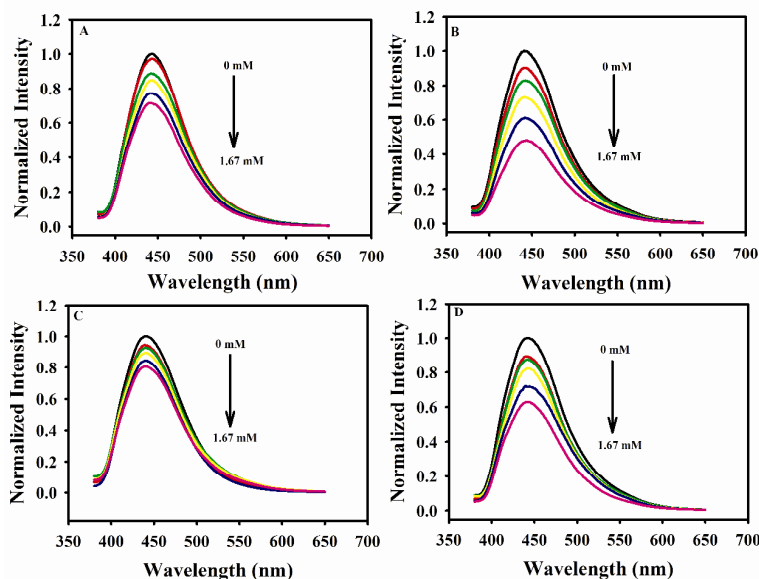

**Figure S9.** The PL spectra of SiQDs in the presence of varying concentrations of AChE, ChOx and ACh. (A): The concentrations of AChE and ChOx are 2 U/mL and 2 U/mL, respectively; (B): The concentrations of AChE and ChOx are 2 U/mL and 0.6 U/mL, respectively; (C): The concentrations of AChE and ChOx are 5 U/mL and 0.3 U/mL, respectively; (D): The concentrations of AChE and ChOx are 0.3 U/mL and 2 U/mL, respectively. The concentrations of ACh: 0, 0.33, 0.5, 0.67, 1.33, 1.67 mM.

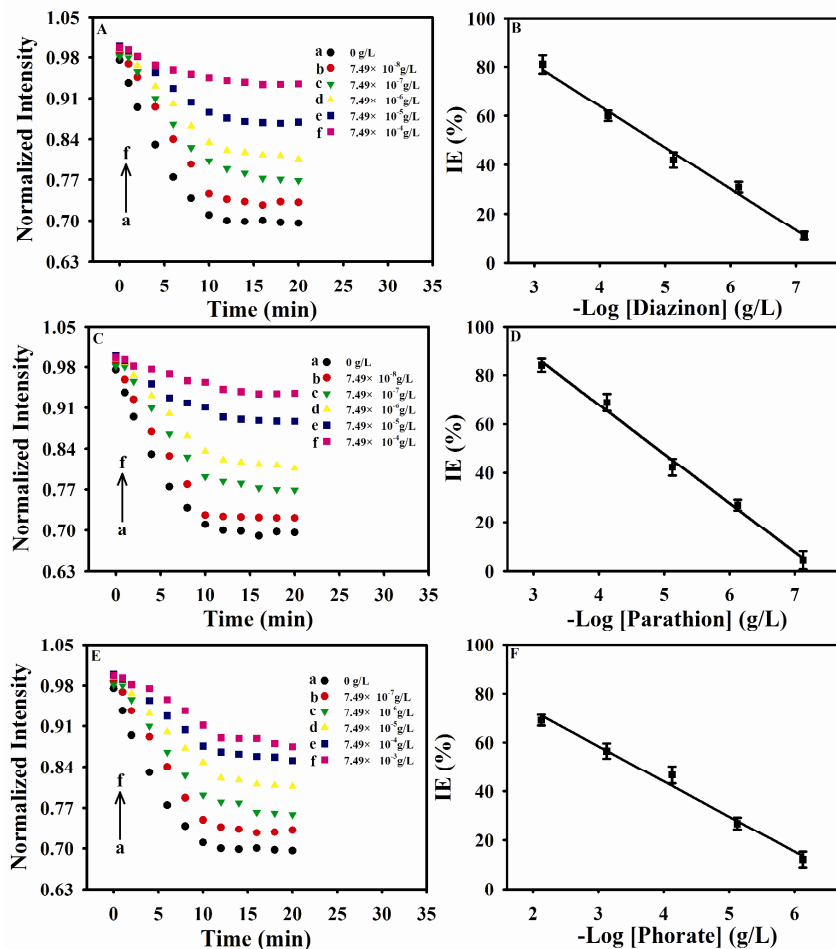

**Figure S10.** (A, C, E): Incubation time dependence of the PL intensity of SiQDs-AChE-ChOx system in the present of 1.0 mM ACh and variable concentrations of diazinon (A), parathion (C) and phorate (E), respectively. (B, D, F): Inhibition efficiency vs the logarithm of diazinon (B), parathion (D) and phorate (F) concentrations. All measurements were performed in PBS, pH= 8.0. The concentrations of AChE and ChOx are 2 U/mL and 0.6 U/mL, respectively.

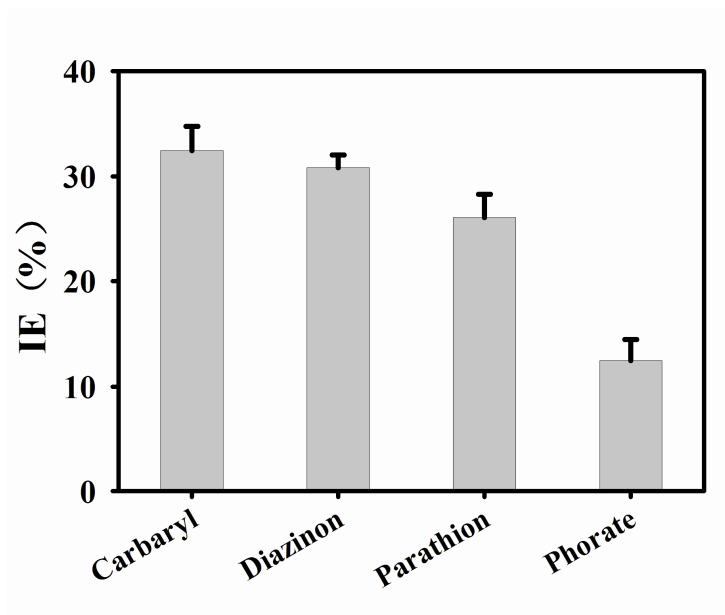

**Figure S11.** Inhibition efficiency of  $8.0 \times 10^{-7}$  g/L of different pesticide toward SiQDs-AChE-ChOx-ACh system. (Each data point is an average of five measurements.).



Table S1. Comparison of various approaches to pesticides detection.

| Target analyte | Detection technique         | System                                                          |           |          | Linear range (g/L)                            | Detect limit (g/L)        | Reference     |
|----------------|-----------------------------|-----------------------------------------------------------------|-----------|----------|-----------------------------------------------|---------------------------|---------------|
| carbaryl       | Colorimetric & fluorometric | Rhodamine nanoparticle                                          | B-covered | gold     | $1.0 \times 10^{-7}$ - $1.0 \times 10^{-4}$   | $1.0 \times 10^{-7}$      | <sup>4</sup>  |
| carbaryl       | colorimetric                | Sol gel derived silica inks                                     |           |          | Not given                                     | $\sim 2.0 \times 10^{-6}$ | <sup>5</sup>  |
| carbaryl       | Amperometric                | Cobalt(II) phthalocyanine modified cellulose-graphite composite |           |          | $1.0 \times 10^{-5}$ - $5.0 \times 10^{-5}$   | Not given                 | <sup>6</sup>  |
| carbaryl       | Amperometric                | CdS-decorated nanocomposite                                     |           | graphene | $2.0 \times 10^{-6}$ - $2.0 \times 10^{-3}$   | $7 \times 10^{-7}$        | <sup>7</sup>  |
| carbaryl       | Cyclic voltammetric         | Self assembled modified electrode                               |           | gold     | $4.0 \times 10^{-4}$ - $6.0 \times 10^{-3}$   | Not given                 | <sup>8</sup>  |
| carbaryl       | Fluorescence                | Label-free SiQDs                                                |           |          | $7.49 \times 10^{-9}$ - $7.49 \times 10^{-4}$ | $7.25 \times 10^{-9}$     | This work     |
| diazinon       | Fluorescence                | CompositeQDs@MIPNanospheres                                     |           |          | $5.0 \times 10^{-5}$ - $6.0 \times 10^{-4}$   | $3.86 \times 10^{-5}$     | <sup>9</sup>  |
| diazinon       | Colorimetric & fluorometric | Rhodamine nanoparticle                                          | B-covered | gold     | $1.0 \times 10^{-7}$ - $1.0 \times 10^{-4}$   | $1.0 \times 10^{-7}$      | <sup>4</sup>  |
| diazinon       | Amperometric                | Cobalt(II) phthalocyanine (CoPc)modified cellulose-graphite     |           |          | $1.9 \times 10^{-5}$ - $5.0 \times 10^{-5}$   | Not given                 | <sup>6</sup>  |
| diazinon       | Fluorescence                | Label-free SiQDs                                                |           |          | $7.49 \times 10^{-8}$ - $7.49 \times 10^{-4}$ | $3.25 \times 10^{-8}$     | This work     |
| parathion      | Amperometry                 | CNTs                                                            |           |          | $5.8 \times 10^{-7}$ - $1.2 \times 10^{-5}$   | $4.4 \times 10^{-6}$      | <sup>10</sup> |
| parathion      | Fluorescence                | (PAH/CdTe QDs)x multilayers                                     |           |          | Not mentioned                                 | $1.3 \times 10^{-9}$      | <sup>11</sup> |
| parathion      | Amperometric                | Cobalt(II) phthalocyanine (CoPc)modified cellulose-graphite     |           |          | $6.0 \times 10^{-6}$ - $1.0 \times 10^{-4}$   | Not given                 | <sup>6</sup>  |
| parathion      | Cyclic voltammetric         | Self assembled modified electrode                               |           | gold     | $4.0 \times 10^{-4}$ - $6.0 \times 10^{-3}$   | Not given                 | <sup>8</sup>  |
| parathion      | Fluorescence                | Label-free SiQDs                                                |           |          | $7.49 \times 10^{-8}$ - $7.49 \times 10^{-4}$ | $6.76 \times 10^{-8}$     | This work     |
| phorate        | Colorimetric & fluorometric | Rhodamine nanoparticle                                          | B-covered | gold     | $1.0 \times 10^{-6}$ - $1.0 \times 10^{-3}$   | $1.0 \times 10^{-6}$      | <sup>4</sup>  |
| phorate        | Two-step technique          | Sensitive equipment materials                                   |           |          | $1.5 \times 10^{-5}$ - $1.0 \times 10^{-3}$   | $1.2 \times 10^{-5}$      | <sup>12</sup> |
| phorate        | Fluorescence                | Label-free SiQDs                                                |           |          | $7.49 \times 10^{-7}$ - $7.49 \times 10^{-3}$ | $1.9 \times 10^{-7}$      | This work     |

## Reference:

- (1) Williams, A. T. R.; Winfield, S. A.; Miller, J. N. *Analyst* **1983**, *108*, 1067-1071.
- (2) Fletcher, A. N. *Photochem. Photobiol.* 1969, *9*, 439-444.
- (3) Zhao, Q.-L.; Zhang, Z.-L.; Huang, B.-H.; Peng, J.; Zhang, M.; Pang, D.-W. *Chem. Commun.* **2008**, 5116-5118.
- (4) Liu, D.; Chen, W.; Wei, J.; Li, X.; Wang, Z.; Jiang, X. *Anal. Chem.* **2012**, *84*, 4185-4191.
- (5) Hossain, S. M. Z.; Luckham, R. E.; McFadden, M. J.; Brennan, J. D. *Anal. Chem.* **2009**, *81*, 9055-9064.
- (6) Tanimoto de Albuquerque, Y. D.; Ferreira, L. F. *Anal. Chim. Acta* **2007**, *596*, 210-221.
- (7) Wang, K.; Liu, Q.; Dai, L.; Yan, J.; Ju, C.; Qiu, B.; Wu, X. *Anal. Chim. Acta* **2011**, *695*, 84-88.
- (8) Pedrosa, V.; Caetano, J.; Machado, S.; Bertotti, M. *Sensors* **2008**, *8*, 4600-4610.
- (9) Zhao, Y.; Ma, Y.; Li, H.; Wang, L. *Anal. Chem.* **2011**, *84*, 386-395.
- (10) Chough, S. H.; Mulchandani, A.; Mulchandani, P.; Chen, W.; Wang, J.; Rogers, K. R. *Electroanalysis* **2002**, *14*, 273-276.
- (11) Zheng, Z.; Zhou, Y.; Li, X.; Liu, S.; Tang, Z. *Biosens. Bioelectron.* **2011**, *26*, 3081-3085.
- (12) Blinov, V.; Volchek, K.; Kuang, W.; Brown, C. E.; Bhalerao, A. *Ind. Eng. Chem. Res.* **2012**, *52*, 1405-1413.
